# Supplementary material for: Novel Antiviral Activities of Obatoclax, Emetine, Niclosamide, Brequinar, and Homoharringtonine
Source: Preprints.org preprint supplement (doi:10.20944/preprints201909.0128.v1), 2019-09-12
Supplement: Supplementary file 1 [file supplementary]

## Sheet: Table S1
Table S1. Compounds, their suppliers and catalogue numbers.
Drug	CAS	Supplier	purity, %	Cat N	MW	Formula
Abamectin	71751-41-2	Dr. Ehrenstorfer GmbH	95.3	DRE-CA10001000	873	C95H142O28
Amiloride (EIPA)	2016-88-8	Cayman Chemical	>98	14409	300	C6H8ClN7O HCl
Amiodarone	1216715-80-8	Cayman Chemical	>99	10010668	645	C25H25D4I2NO3 HCl
Amodiaquine	86-42-0	Cayman Chemical	>95	15954	356	C20H22ClN3O
Apilimod	54550-10-0	Axon MedChem	99.7	1369	419	C23H26N6O2
Arbidol	131707-23-8	Cayman Chemical	>98.5	16933	477	C22H25BrN2O3S HCl
Artesunate	88495-63-0	Acros		460340050	384	C19H28O8
Bepridil	68099-86-5	Cayman Chemical	>98	19645	403	C24H34N2O HCl
Berberine	633-65-8	Cayman Chemical	>95	10006427	336	C20H18ClNO4
Brequinar	96187-53-0	Cayman Chemical	>98	24445	375	C23H15F2NO2
Bromocriptine	22260-51-1	Cayman Chemical	>98	14598	656	C32H40BrN5O5 CH3SO3H
Camostat	59721-29-8	Cayman Chemical	>98	16018	398	C20H22N4O5 CH3SO3H
Camptothecin	7689-03-4'	Cayman Chemical	>98	11694	348	C20H16N2O4
DFMO (Difluoromethylomithine, eflotnithine)	70052-12-9	ChemCruz	>98	sc-204723	182	C6H12F2N2O2
7-(2,3-Dihydroxypropyl)theophylline (Dyphylline)	479-18-5	Acros		115051000	524	C10H14N4O4
Emetine	7083-71-8	Cayman Chemical	>98	21048	481	C29H40N2O4 2HCl
Emodin	518-82-1	Cayman Chemical	>98	13109	270	C15H10O5
Fenretinide (4-HRP)	65646-68-6	Cayman Chemical	>98	17688	392	C26H33NO2
Formoterol	183814-30-4	Sigma-Aldrich		F0372000	420	C19H24N2O4 0.5C4H4O4 H2O
Glycyrrhizic acid	1405-86-3	MCE	>98	HY-N0184	823	C42H62O16
Homoharringtonine	26833-87-4	Cayman Chemical	>98	14631	546	C29H39NO9
Kasugamycin	19408-46-9	Fluka		R1114-100MG	379	C14H25N3O9
Lanatoside C	17575-22-3	MCE	99	HY-B1030	985	C49H76O20
Letermovir	917389-32-3	Cayman Chemical	>98	17556	573	C29H28F4N4O4
Lobucavir	127759-89-1	Santa Cruz	98	sc-211744	265	C11H15N5O3
Luteolin	491-70-3	Santa Cruz	>98	sc-203119	286	C15H10O6
Manidipine	89226-50-6	Cayman Chemical	>98	23614	611	C35H38N4O6
Maribavir	176161-24-3	MCE	>98	HY-16305	376	C15H19Cl2N3O4
Mitoxantrone	70476-82-3	Cayman Chemical	95	14842	517	C22H28N4O6 HCl
Nafamostat	82956-11-4	Cayman Chemical	>98	14837	347	C19H17N5O2 2CH3SO3H
Nelfinavir	159989-65-8	Cayman Chemical	>98	15144	664	C32H45N3O4S CH3SO3H
Niclosamide	50-65-7	Dr. Ehrenstorfer GmbH	97	C15510000	327	C13H8Cl2N2O4
Novobiocin	‎303-81-1	Carbosynth		FN59697	612	C31H36N2O11
Obatoclax	803712-79-0	Cayman Chemical	>98	11499	414	C20H19N3O CH3SO3H
Posaconazole	171228-49-2	Cayman Chemical	>95	14737	701	C37H42F2N8O4
PSI-7977 (Sofosbuvir)	1190307-88-0	MCE	100	HY-15005	530	C22H29FN3O9P
Quinine	130-95-0	Alfa Aesar	99	A10459.09	324	C20H24N2O2
Raloxifene	82640-04-8	Cayman Chemical	>98	10011620	474	C28H27NO4S HCl
Regorafenib	755037-03-7	Cayman Chemical	>98	18498	483	C21H15ClF4N4O3
Roscovitine	186692-46-6	Cayman Chemical	>98	10009569	355	C19H26N6O
Sorafenib (BAY 43-9006)	284461-73-0	Cayman Chemical	>98	10009644	465	C21H16ClF3N4O3
Suramin	129-46-4	Acros	98	328540500	1297	C51H40N6O23S6
Tamoxifen	10540-29-1	SigmaAldrich	>99	85256-50MG	372	C26H29NO

## Sheet: Table S2
Table S2. Broad-spectrum antivirals used in the study.
Drug	Primary indication	Virus	Status as antiviral	Activity in mice	Potential target	Reference
4-HPR	Approved anticancer	DENV	Experimental	*	Viral RNA pol	PMID:24903662
		WNV	Experimental		Viral RNA pol	PMID:25313218
		HCV	Experimental		Viral RNA pol	PMID:25313218
		ZIKV	Experimental		Viral RNA pol	PMID:29051080
		RSV	Experimental		Viral RNA pol	PMID:26307636
		HIV-1	Experimental		Viral RT	PMID:16375981
Abamectin	Approved antihelmintic	CHIKV	Experimental		Unknown	PMID:26752081
		SINV	Experimental		Unknown	PMID:26752081
		YFV	Experimental		Unknown	PMID:26752081
Amodiaquine	Approved antimalarial	DENV	Experimental		Unknown	PMID:24680954
		WNV	Experimental		Unknown	PMID:24680954
		EBOV	Experimental		Unknown	PMID:30395872
		ZIKV	Experimental		Unknown	PMID:29315671
		SINV	Experimental		Unknown	PMID:30791609
		LASV	Experimental		Unknown	PMID:30700611
		HCV	Experimental		Unknown	PMID:30791609
		VSV	Experimental		Unknown	PMID:30791609
		RABV	Experimental		Unknown	PMID:30791609
		HSV-1	Experimental		Unknown	PMID:30791609
		YFV	Experimental		Unknown	PMID:30791609
		RRV	Experimental		Unknown	PMID:30791609
Arbidol	Approved antiviral	FLUAV	Approved		Multiple	CID:131411
		LASV	Experimental		Multiple	PMID:30700611
		EBOV	Experimental		Multiple	PMID:30700611
		HSV-2	Experimental	*	Multiple	PMID:30612085
		ZIKV	Experimental		Multiple	PMID:29895962
		TBEV	Experimental		Multiple	PMID:29642580
		WNV	Experimental		Multiple	PMID:29642580
		HSV-1	Experimental		Multiple	PMID:28890393
Artesunate	Approved antimalarial	CMV	Investigational		Unknown	NCT00284687
		EBV	Experimental		Unknown	PMID:30677427
		HHV-6	Experimental		Unknown	PMID:30677427
		BKV	Experimental		Unknown	PMID:30677427
		JCV	Experimental		Unknown	PMID:30677427
Berberine	Investigational anticancer	CHIKV	Experimental		Unknown	PMID:26752081
		SINV	Experimental		Unknown	PMID:26752081
		CMV	Experimental		Unknown	PMID:30738836
		HCV	Experimental		Unknown	PMID:30668413
		ZIKV	Experimental		Unknown	PMID:30641880
		HEV-B	Experimental		Unknown	PMID:28341822
		HEV-A	Experimental		Unknown	PMID:28081706
		RSV	Experimental		Unknown	PMID:25939536
		HSV-1	Experimental		Unknown	PMID:24913175
		FLUAV	Experimental		Unknown	PMID:21683808
		HPV	Experimental		Unknown	PMID:21496227
		HIV-1	Experimental		Unknown	PMID:21295891
Brequinar	Investigational anticancer	DENV	Experimental		Human DHODH	NCT03760666
		WNV	Experimental		Human DHODH	PMID:20606073
		YFV	Experimental		Human DHODH	PMID:20606073
		LASV	Experimental		Human DHODH	PMID:31302150
		JUNV	Experimental		Human DHODH	PMID:31302150
		LCMV	Experimental		Human DHODH	PMID:31302150
		VSV	Experimental		Human DHODH	PMID:20606073
		HIV-1	Experimental		Human DHODH	This study
		POWV	Experimental		Human DHODH	PMID:20606073
Bromocriptine	Approved anticancer	DENV	Experimental		Viral protease	PMID:27181378
		TBEV	Experimental		Viral protease	PMID:27181378
		ZIKV	Experimental		Viral protease	PMID:28185815
Camostat	Approved anticancer	MERS-CoV	Experimental		Human PRSS1	PMID:25666761
		SARS-CoV	Experimental		Human PRSS1	PMID:25666761
		FLUAV	Experimental		Human PRSS1	PMID:21802447
		FLUBV	Experimental		Human PRSS1	PMID:1510439
Diphyllin	Investigational anticancer	FLUAV	Experimental	*	Human vATPase	PMID:30587980
		EBOV	Experimental		Human vATPase	PMID:30335906
		HIV-1	Experimental		Human vATPase	PMID:29328465
EIPA (amiloride)	Approved anti-arrhythmic	EBOV	Experimental		Human SLC9A1	PMID:27161622
		MARV	Experimental		Human SLC9A1	PMID:27161622
		LASV	Experimental		Human SLC9A1	PMID:24173224
		JUNV	Experimental		Human SLC9A1	PMID:24173224
		MEV	Experimental		Human SLC9A1	PMID:28250131
		HRV-A	Experimental		Human SLC9A1	PMID:23913188
		HSV-1	Experimental		Human SLC9A1	PMID:25210183
		KSHV	Experimental		Human SLC9A1	PMID:19279100
		HEV-B	Experimental		Viral RNA pol	PMID:21795353
		HEV-A	Experimental		Viral RNA pol	PMID:31326561
		CHIKV	Experimental		Human SLC9A1	PMID: 31449523
		HEV-C	Experimental		Viral RNA pol	PMID:25058507
		HRV-B	Experimental		Human SLC9A1	PMID:16054245
Eflornithine	Approved antiprotozoal	CHIKV	Experimental		Human ODC1	PMID:27535047
		HEV-B	Experimental		Human ODC1	PMID:27535047
		DENV	Experimental		Human ODC2	PMID:27535048
		JEV	Experimental		Human ODC3	PMID:27535049
		MERS-CoV	Experimental		Human ODC4	PMID:27535050
		HSV-1	Experimental		Human ODC1	PMID:12569563
		CMV	Experimental		Human ODC1	PMID:6283366
		VSV	Experimental		Human ODC1	PMID:27535047
		ZIKV	Experimental		Human ODC1	PMID:27535047
		SINV	Experimental		Human ODC1	PMID:27535047
Emetine	Approved antiprotozoal	ZIKV	Experimental		Multiple	PMID:29872540
		EBOV	Experimental		Multiple	PMID:29872540
		RABV	Experimental		Multiple	PMID:30028873
		CMV	Experimental	*	Multiple	PMID:27336364
		HCoV-OC43	Experimental		Multiple	PMID:30918074
		RVFV	Experimental		Multiple	This study
		HMPV	Experimental		Multiple	This study
		HSV-2	Experimental		Multiple	This study
		HEV-B	Experimental		Multiple	This study
		HIV-1	Experimental		Multiple	PMID:26111177
Emodine	Investigational anticancer	ZIKV	Experimental		Multiple	PMID:30641880
		FLUAV	Experimental	*	Multiple	PMID:29057806
		HEV-A	Experimental		Multiple	PMID:27840410
		HEV-B	Experimental	*	Multiple	PMID:26621875
		EBV	Experimental		Multiple	PMID:24448066
		CMV	Experimental		Multiple	PMID:25499125
		SARS-CoV	Experimental		Multiple	PMID:16730806
		HBV	Experimental	*	Multiple	PMID:19960563
		HSV-1	Experimental		Multiple	PMID:18552872
Formoterol	Approved antiasthmatic	HEV-A	Experimental		Viral helicase	PMID:26856848
		HEV-B	Experimental		Viral helicase	PMID:26856848
		HEV-C	Experimental		Viral helicase	PMID:26856848
		HEV-D	Experimental		Viral helicase	PMID:26856848
Glycyrrhizin	Approved anti-inflammatory	SARS-CoV	Experimental		Human TNF	PMID:15715493
		HPIV-2	Experimental		Human TNF	PMID:29070744
		FLUAV	Experimental		Human TNF	PMID:25801933
		HSV-1	Experimental		Human TNF	PMID:24173639
		HCV	Experimental		Human TNF	PMID:23874843
		HEV-B	Experimental		Human TNF	PMID:23454684
		HEV-A	Experimental		Human TNF	PMID:23454684
		RV	Experimental		Human TNF	PMID:22616823
		KSHV	Experimental		Human TNF	PMID:21880767
		HIV-1	Experimental		Human TNF	PMID:19529000
		EBV	Experimental		Human TNF	PMID:18423902
Homoharringtonine	Approved anticancer	HBV	Experimental		Human ribosome	PMID:17458779
		MERS-CoV	Experimental		Human ribosome	PMID:25451075
		HEV-B	Experimental		Human ribosome	This study
		VZV	Experimental		Human ribosome	PMID:30456755
		HSV-1	Experimental		Human ribosome	PMID:30388805
Isolanid (lanatoside C)	Approved antiarrhythmic	DENV	Experimental		Unknown	PMID:25251726
		KUNV	Experimental		Unknown	PMID:25251726
		CHIKV	Experimental		Unknown	PMID:25251726
		SINV	Experimental		Unknown	PMID:25251726
		HEV-B	Experimental		Unknown	PMID:25251726
Letermovir	Approved antiviral	CMV	Approved		Viral terminase	CID:45138674
		HSV-1	Experimental		Viral terminase	PMID:30677427
		HSV-2	Experimental		Viral terminase	PMID:30677427
		VZV	Experimental		Viral terminase	PMID:30677427
		EBV	Experimental		Viral terminase	PMID:30677427
		HHV-6	Experimental		Viral terminase	PMID:30677427
		ADV	Experimental		Viral terminase	PMID:30677427
Lobucavir	Investigational antiviral	CMV	Investigational		Viral DNA pol	NCT00002352
		HIV-1	Investigational		Viral DNA pol	NCT00002352
		HBV	Experimental		Viral DNA pol	PMID:10760047
		HSV-1	Experimental		Viral DNA pol	PMID:1656194
Luteolin	Approved anticancer	FLUAV	Experimental		Unknown	PMID:30758716
		DENV	Experimental		Unknown	PMID:29665375
		HBV	Experimental		Unknown	PMID:29270164
		EBV	Experimental		Unknown	PMID:27185626
		JEV	Experimental		Unknown	PMID:27126774
		HEV-A	Experimental		Unknown	PMID:26870944
		CHIKV	Experimental		Unknown	PMID:26003593
		HEV-B	Experimental		Unknown	PMID:25036464
		HIV-1	Experimental		Unknown	PMID:22140483
		SARS-CoV	Experimental		Unknown	PMID:15452254
		TBEV	Experimental		Unknown	PMID:29537738
Maribavir	Investigational antiviral	CMV	Investigational		Viral DNA pol	NCT02931539
		HHV-6	Experimental		Viral DNA pol	PMID:30677427
		EBV	Experimental		Viral DNA pol	PMID:30677427
Nafamostat	Approved anticoagulant	EBOV	Experimental		Human TMPRSS2	PMID:26346967
		FLUAV	Experimental		Human TMPRSS2	PMID:1510439
		FLUBV	Experimental		Human TMPRSS2	PMID:1510439
		MERS-CoV	Experimental		Human TMPRSS2	PMID:27550352
Nelfinavir	Approved antiviral	HIV-1	Approved		Viral protease	CID:64143
		HSV-1	Experimental		Viral protease	PMID:24574416
		HCV	Experimental		Viral protease	PMID:19302339
		CHIKV	Experimental		Viral protease	https://doi.org/10.1039/C5RA14469H
		DENV	Experimental		Viral protease	https://doi.org/10.1039/C5RA14469H
Niclosamide	Approved antihelmintic	LASV	Experimental		Multiple	PMID:30700611
		EBOV	Experimental		Multiple	PMID:30700611
		DENV	Experimental	*	Multiple	PMID:30125275
		ZIKV	Experimental		Multiple	PMID:29378701
		EBV	Experimental		Multiple	PMID:27939840
		CHIKV	Experimental		Multiple	PMID:27742486
		JEV	Experimental		Multiple	PMID:24348901
		HCV	Experimental		Multiple	PMID:22059983
		SARS-CoV	Experimental		Multiple	PMID:15215127
		FLUAV	Experimental		Multiple	PMID:23133371
		HRV-A	Experimental		Multiple	PMID:23133371
		VSV	Experimental		Multiple	PMID:30791609
		RABV	Experimental		Multiple	PMID:30791609
		HSV-1	Experimental		Multiple	PMID:30791609
		VACV	Experimental		Multiple	PMID:30791609
		HIV-1	Experimental		Multiple	PMID:30791609
		HSV-2	Experimental		Multiple	This study
		SINV	Experimental		Multiple	PMID:30791609
Posaconazole	Approved antifungal	EBOV	Experimental		Human OSBP	PMID:27890675
		DENV	Experimental		Human OSBP	PMID:29981375
		Par-A3	Experimental		Human OSBP	PMID:29155163
		ZIKV	Experimental		Human OSBP	PMID:29981375
Roscovitine	Investigational anti-Cushing disease	HIV-1	Experimental		Human CDKs	PMID:17625008
		HSV-1	Experimental		Human CDKs	PMID:11773384
		VZV	Experimental	*	Human CDKs	PMID:20307580
		EBV	Experimental		Human CDKs	PMID:21209116
		JCV	Experimental		Human CDKs	PMID:17919676
Sofosbuvir	Approved antiviral	HCV	Approved		Viral RNA pol	CID:45375808
		ZIKV	Experimental	*	Viral RNA pol	PMID:27902933
		DENV	Experimental		Viral RNA pol	PMID:28834304
		CHIKV	Experimental	*	Viral RNA pol	PMID:30455237
Suramin	Approved antiprotozoal	ZIKV	Experimental		Viral protease	PMID:30393012
		EBOV	Experimental		Multiple	PMID:27581733
		CHIKV	Experimental		Multiple	PMID:27581733
		HEV-A	Experimental		Multiple	PMID:28218309
		DENV	Experimental		Multiple	PMID:25281902
		RVFV	Experimental		Multiple	PMID:25267680
		HDV	Experimental		Multiple	PMID:21187936
		HCV	Experimental		Multiple	PMID:10022794
		HIV-1	Experimental		Multiple	PMID:31346035
		NOV	Experimental		Multiple	PMID:24622391
Kasugamycin	Approved antibacterial	HSV-2	Experimental	*	Unknown	PMID:29632368
		ZIKV	Experimental	*	Unknown	PMID:29632368
		FLUAV	Experimental	*	Unknown	PMID:29632368
Amiodarone	Approved antiarrhythmic	EBOV	Experimental		Human CYPs	PMID:30016444
		SINV	Experimental		Human CYPs	PMID:30791609
		RRV	Experimental		Human CYPs	PMID:30791609
		DENV	Experimental		Human CYPs	PMID:30791609
		YFV	Experimental		Human CYPs	PMID:30791609
		HSV-1	Experimental		Human CYPs	PMID:21502533
		HCV	Experimental		Human CYPs	PMID:23659500
		VSV	Experimental		Human CYPs	PMID:23659500
		SARS-CoV	Experimental		Human CYPs	PMID:18314540
Mitoxantrone	Approved anticancer	SINV	Experimental		Human TOP2	PMID:30791609
		RRV	Experimental		Human TOP2	PMID:30791609
		DENV	Experimental		Human TOP2	PMID:30791609
		ZIKV	Experimental	*	Human TOP2	PMID:30791609
		YFV	Experimental		Human TOP2	PMID:30791609
		HSV-1	Experimental		Human TOP2	PMID:30791609
		HCV	Experimental		Human TOP2	PMID:30791609
Quinine	Approved antimalarial	DENV	Experimental		Unknown	PMID:30055216
		HSV-1	Experimental		Unknown	PMID:17600687
		FLUAV	Experimental		Unknown	PMID:4921360
Raloxifene	Approved antiosteoporosis	SINV	Experimental		Human ER	PMID:30791609
		DENV	Experimental		Human ER	PMID:30791609
		YFV	Experimental		Human ER	PMID:30791609
		HSV-1	Experimental		Human ER	PMID:30791609
		VSV	Experimental		Human ER	PMID:30791609
		RABV	Experimental		Human ER	PMID:30791609
		HIV-1	Experimental		Human ER	PMID:30791609
		VACV	Experimental		Human ER	PMID:30791609
		EBOV	Experimental	*	Human ER	PMID:23785035
Apilimod	Investigational anticancer	EBOV	Experimental		Human PIKfyve	PMID:28403145
		MARV	Experimental		Human PIKfyve	PMID:28403145
		LASV	Experimental		Human PIKfyve	PMID:30700611
Tamoxifen	Approved anticancer	HIV-1	Investigational		Human ER	NCT03382834
		EBOV	Experimental	*	Human ER	PMID:23785035
		HCV	Experimental		Human ER	PMID:17704057
		HSV-1	Experimental		Human ER	PMID:24657267
Novobiocin	Approved antibacterial	ZIKV	Experimental	*	Multiple	PMID:28712942
		JEV	Experimental		Multiple	PMID:2846831
		VACV	Experimental		Multiple	PMID:9300044
		KSHV	Experimental		Multiple	PMID:22106228
		EBV	Experimental		Multiple	PMID:24821256
		HSV-1	Experimental	*	Multiple	PMID:3041048
Manidipine	Approved antihypertensive	JEV	Experimental	*	Multiple	PMID:28814523
		ZIKV	Experimental		Multiple	PMID:28814523
		WNV	Experimental		Multiple	PMID:28814523
		DENV	Experimental		Multiple	PMID:28814523
		CMV	Experimental		Multiple	PMID:29274844
Bepridil	Approved anti-anginal	DENV	Experimental		Viral glycoproteins	PMID:30791609
		MARV	Experimental	*	Viral glycoproteins	PMID:29982632
		EBOV	Experimental		Viral glycoproteins	PMID:29939303
Obatoclax	Investigational anticancer	FLUAV	Experimental		Human MCL1	PMID:22910914
		ZIKV	Experimental		Human MCL1	PMID:28049006
		WNV	Experimental		Human MCL1	PMID:27993855
		YFV	Experimental		Human MCL1	PMID:27993855
		RVFV	Experimental		Human MCL1	This study
		HEV-B	Experimental		Human MCL1	This study
		HMPV	Experimental		Human MCL1	This study
		HSV-2	Experimental		Human MCL1	This study
		SINV	Experimental		Human MCL1	PMID:22910914
		JUNV	Experimental		Human MCL1	PMID:31302150
		LASV	Experimental		Human MCL1	PMID:31302150
		LCMV	Experimental		Human MCL1	PMID:31302150
Camptothecin	Investigational anticancer	HEV-A	Experimental		Human TOP1	PMID:28427827
		HIV-1	Experimental		Human TOP1	PMID:20110878
		HSV-1	Experimental		Human TOP1	PMID:20397103
		KSHV	Experimental		Human TOP1	PMID:22106228
		HCV	Experimental		Human TOP1	PMID:26045353
		FLUAV	Experimental		Human TOP2	PMID:4475096
		EBV	Experimental		Human TOP1	PMID:19494003
Regorafenib	Approved anticancer	FLUAV	Experimental		Human RTKs	PMID:30883607
		SFTSV	Experimental		Human RTKs	PMID:31027241
		HTV	Experimental		Human RTKs	PMID:30883607
		HSV-1	Experimental		Human RTKs	PMID:30883607
		VSV	Experimental		Human RTKs	PMID:30883607
Sorafenib	Approved anticancer	FLUAV	Experimental		Human RTKs	PMID:30883607
		HTV	Experimental		Human RTKs	PMID:30883607
		HSV-1	Experimental		Human RTKs	PMID:30883607
		SINV	Experimental		Human RTKs	PMID:29981794
		CHIKV	Experimental		Human RTKs	PMID:29981794
		RABV	Experimental		Human RTKs	PMID: 29459063
		HCV	Investigational		Human RTKs	PMID:23281732
		HEV-A	Experimental		Human RTKs	PMID:24680956
		VSV	Experimental		Human RTKs	PMID:30883607

## Sheet: Table S3
Table S3. Human viruses and associated diseases.
Virus	Abbreviation	Family	Group	Viral disease
Adenovirus	ADV	Adenoviridae	dsDNA	Acute respiratory disease
Andes virus	ANDV	Hantaviridae	(-)ssRNA	Hantavirus cardiopulmonary syndrome
BK virus	BKV	Polyomaviridae	dsDNA	Nephropathy and hemorrhagic cystitis
Bunyamwera virus	BUNV	Peribunyaviridae	(-)ssRNA	Bunyamwera fever
Chikungunya virus	CHIKV	Togaviridae	(+)ssRNA	Chikungunya fever
Coxsackievirus A	CAV9 (HEV-B)	Picornaviridae	(+)ssRNA	Viral myocarditis, infection of CNS and respiratory tract
Coxsackievirus B3	CVB3 (HEV-B)	Picornaviridae	(+)ssRNA	Viral myocarditis
Coxsackievirus B4	CVB4 (HEV-B)	Picornaviridae	(+)ssRNA	Herpangina, tonsillitis, and pharyngitis
Crimean–Congo hemorrhagic fever virus	CCHFV	Nairoviridae	(-)ssRNA	Crimean–Congo hemorrhagic fever
Cytomegalovirus	CMV	Herpesviridae	dsDNA	Mononucleosis-like illness*
Dengue virus	DENV	Flaviviridae	(+)ssRNA	Dengue fever
Ebola virus	EBOV	Filoviridae	(-)ssRNA	Ebola hemorrhagic fever
Echovirus 1	EV1 (HEV-B)	Picornaviridae	(+)ssRNA	Febrile illness and aseptic meningitis
Echovirus 6	EV6 (HEV-B)	Picornaviridae	(+)ssRNA	Neurological symptoms, aseptic meningitis
Enterovirus 68	EV68 (HEV-D)	Picornaviridae	(+)ssRNA	Acute flaccid myelitis.
Enterovirus 70	EV70 (HEV-D)	Picornaviridae	(+)ssRNA	Acute hemorrhagic conjunctivitis
Enterovirus 71	EV71 (HEV-A)	Picornaviridae	(+)ssRNA	Hand, foot, and mouth disease
Epstein-Barr virus	EBV	Herpesviridae	dsDNA	Infectious mononucleosis
Hantavirus	HTV	Hantaviridae	(-)ssRNA	Hantavirus cardiopulmonary syndrome
Hendra virus	HenV	Paramyxoviridae	(-)ssRNA	Severe encephalitis and respiratory disease
Hepatitis B virus	HBV	Hepadnaviridae	dsDNA-RT	Hepatitis B
Hepatitis C virus	HCV	Flaviviridae	(+)ssRNA	Hepatitis C
Hepatitis D virus	HDV	Unassigned	(-)ssRNA	Hepatitis D
Hepatitis E virus	HEV	Hepeviridae	(+)ssRNA	Hepatitis E
Herpes simplex virus 1	HSV-1	Herpesviridae	dsDNA	Cold sores
Herpes simplex virus 2	HSV-2	Herpesviridae	dsDNA	Genital herpes
Human coronavirus OC43	HCoV-OC43	Coronaviridae	(+)ssRNA	Common cold
Human coronavirus strain 229E	HCoV-229E	Coronaviridae	(+)ssRNA	Common cold
Human herpesvirus 6	HHV-6	Herpesviridae	dsDNA	Exanthema subitum
Human herpesvirus 7	HHV-7	Herpesviridae	dsDNA	Exanthema subitum
Human immunodeficiency virus 1	HIV-1	Retroviridae	ssRNA-RT	Acquired immune deficiency syndrome
Human immunodeficiency virus 2	HIV-2	Retroviridae	ssRNA-RT	Acquired immune deficiency syndrome
Human metapneumovirus	HMPV	Pneumoviridae	(-)ssRNA	Lower respiratory infection in young children
Human papillomavirus	HPV	Papillomaviridae	dsDNA	Genital warts and laryngeal papillomatosis
Human parainfluenza virus 1	HPIV-1	Paramyxoviridae	(-)ssRNA	Upper respiratory tract infections
Human parainfluenza virus 2	HPIV-2	Paramyxoviridae	(-)ssRNA	Upper respiratory tract infections
Human rhinovirus 14	HRV14 (HRV-B)	Picornaviridae	(+)ssRNA	Cold-like illnesses
Human rhinovirus 1B	HRV1B (HRV-A)	Picornaviridae	(+)ssRNA	Cold-like illnesses
Human rhinovirus 89	HRV89 (HRV-A)	Picornaviridae	(+)ssRNA	Cold-like illnesses
Human rhinovirus A16	HRV16 (HRV-A)	Picornaviridae	(+)ssRNA	Cold-like illnesses
Human rhinovirus A2	HRV2 (HRV-A)	Picornaviridae	(+)ssRNA	Cold-like illnesses
Influenza A virus	FLUAV	Orthomyxoviridae	(-)ssRNA	Influenza
Influenza B virus	FLUBV	Orthomyxoviridae	(-)ssRNA	Influenza
Influenza C virus	FLUCV	Orthomyxoviridae	(-)ssRNA	Influenza
Japanese encephalitis virus	JEV	Flaviviridae	(+)ssRNA	Japanese encephalitis
John Cunningham virus	JCV	Polyomaviridae	dsDNA	Progressive multifocal leukoencephalopathy
Junin virus	JUNV	Arenaviridae	(-)ssRNA	Argentine hemorrhagic fever
Kaposi's sarcoma-associated herpesvirus	KSHV	Herpesviridae	dsDNA	Kaposi's sarcoma
Kunjin virus	KUNV	Flaviviridae	(+)ssRNA	Kunjin virus disease
Lassa virus	LASV	Arenaviridae	(-)ssRNA	Lassa hemorrhagic fever
Marburg virus	MARV	Filoviridae	(-)ssRNA	Marburg hemorrhagic fever
Measles virus	MEV	Paramyxoviridae	(-)ssRNA	Measles
Middle East respiratory syndrome coronavirus	MERS-CoV	Coronaviridae	(+)ssRNA	Middle East respiratory syndrome
Molluscum contagiosum virus	MCV	Poxviridae	dsDNA	Molluscum contagiosum
Nipah virus	NiV	Paramyxoviridae	(-)ssRNA	Severe encephalitis and respiratory disease
Norovirus	NoV	Caliciviridae	(+)ssRNA	Gastroenteritis
Parechovirus A3	Par-A3	Picornaviridae	(+)ssRNA	Infection of the central nervous system
Parvovirus B19	B19V	Parvoviridae	ssDNA	Erythema infectiosum
Poliovirus	PV (HEV-C)	Picornaviridae	(+)ssRNA	Poliomyelitis
Powassan virus	POWV	Flaviviridae	(+)ssRNA	Powassan virus disease
Rabies virus	RABV	Rhabdoviridae	(-)ssRNA	Rabies
Ravn virus	RAVV	Filoviridae	(-)ssRNA	RAVN hemorrhagic fever
Respiratory syncytial virus	RSV	Pnevmoviridae	(-)ssRNA	Lower respiratory tract infections
Rift Valley fever virus	RVFV	Phenuiviridae	(-)ssRNA	Rift Valley fever
Ross River virus	RRV	Togaviridae	(+)ssRNA	Influenza-like illness and polyarthritis
Rotavirus	RV	Reoviridae	dsRNA	Gastroenteritis
Rubella virus	RuV	Togaviridae	(+)ssRNA	Rubella
Saffold virus	SAFV	Picornaviridae	(+)ssRNA	Unknown
Severe acute respiratory syndrome coronavirus	SARS-CoV	Coronaviridae	(+)ssRNA	Severe acute respiratory syndrome
Severe fever with thrombocytopenia syndrome virus	SFTSV	Phenuiviridae	(-)ssRNA	Severe fever with thrombocytopenia syndrome
Simian vacuolating virus 40	SV40	Polyomaviridae	dsDNA	Causes tumors
Sin Nombre virus	SNV	Hantaviridae	(-)ssRNA	Hantavirus cardiopulmonary syndrome
Sindbis virus	SINV	Togaviridae	(+)ssRNA	Rash and arthritis
Tick-borne encephalitis virus	TBEV	Flaviviridae	(+)ssRNA	Tick-borne encephalitis
Vaccinia virus	VACV	Poxviridae	dsDNA	No disease in human
Varicella zoster virus	VZV	Herpesviridae	dsDNA	Chickenpox (varicella)
Variola virus	VARV	Poxviridae	dsDNA	Smallpox
Vesicular stomatitis virus	VSV	Rhabdoviridae	(-)ssRNA	Vesicular stomatitis
West Nile virus	WNV	Flaviviridae	(+)ssRNA	West Nile fever
Yellow fever virus	YFV	Flaviviridae	(+)ssRNA	Yellow fever
Zika virus	ZIKV	Flaviviridae	(+)ssRNA	Zika virus disease
